# Supplementary material for: Emergent Altermagnetism and Topological Response In Janus MnPSX Monolayers
Source: Research Square preprint supplement (doi:10.21203/rs.3.rs-7964011/v1), 2025-11-11
Supplement: Supplementary file 1 [file ef696829cd3fb1cefbf4357c.docx]

**Supplementary Information of the manuscript: Emergent Altermagnetism and Topological Response In Janus MnPSX Monolayers**

J. Guerrero-Sanchez1, R. Ponce-Perez1, D.M. Hoat2,3, R. Gonzalez-Hernandez4,*

1Universidad Nacional Autónoma de México, Centro de Nanociencias y Nanotecnología, Apartado Postal 14, Ensenada, Baja California, Código Postal 22800, Mexico

2Institute of Theoretical and Applied Research, Duy Tan University, Ha Noi 100000, Viet Nam

3School of Engineering and Technology, Duy Tan University, Da Nang 550000, Viet Nam

4Grupo de Investigación en Física Aplicada, Departamento de Física, Universidad del Norte, Barranquilla, Colombia.

**Author to whom correspondence should be addressed: rhernandezj@uninorte.edu.co.*


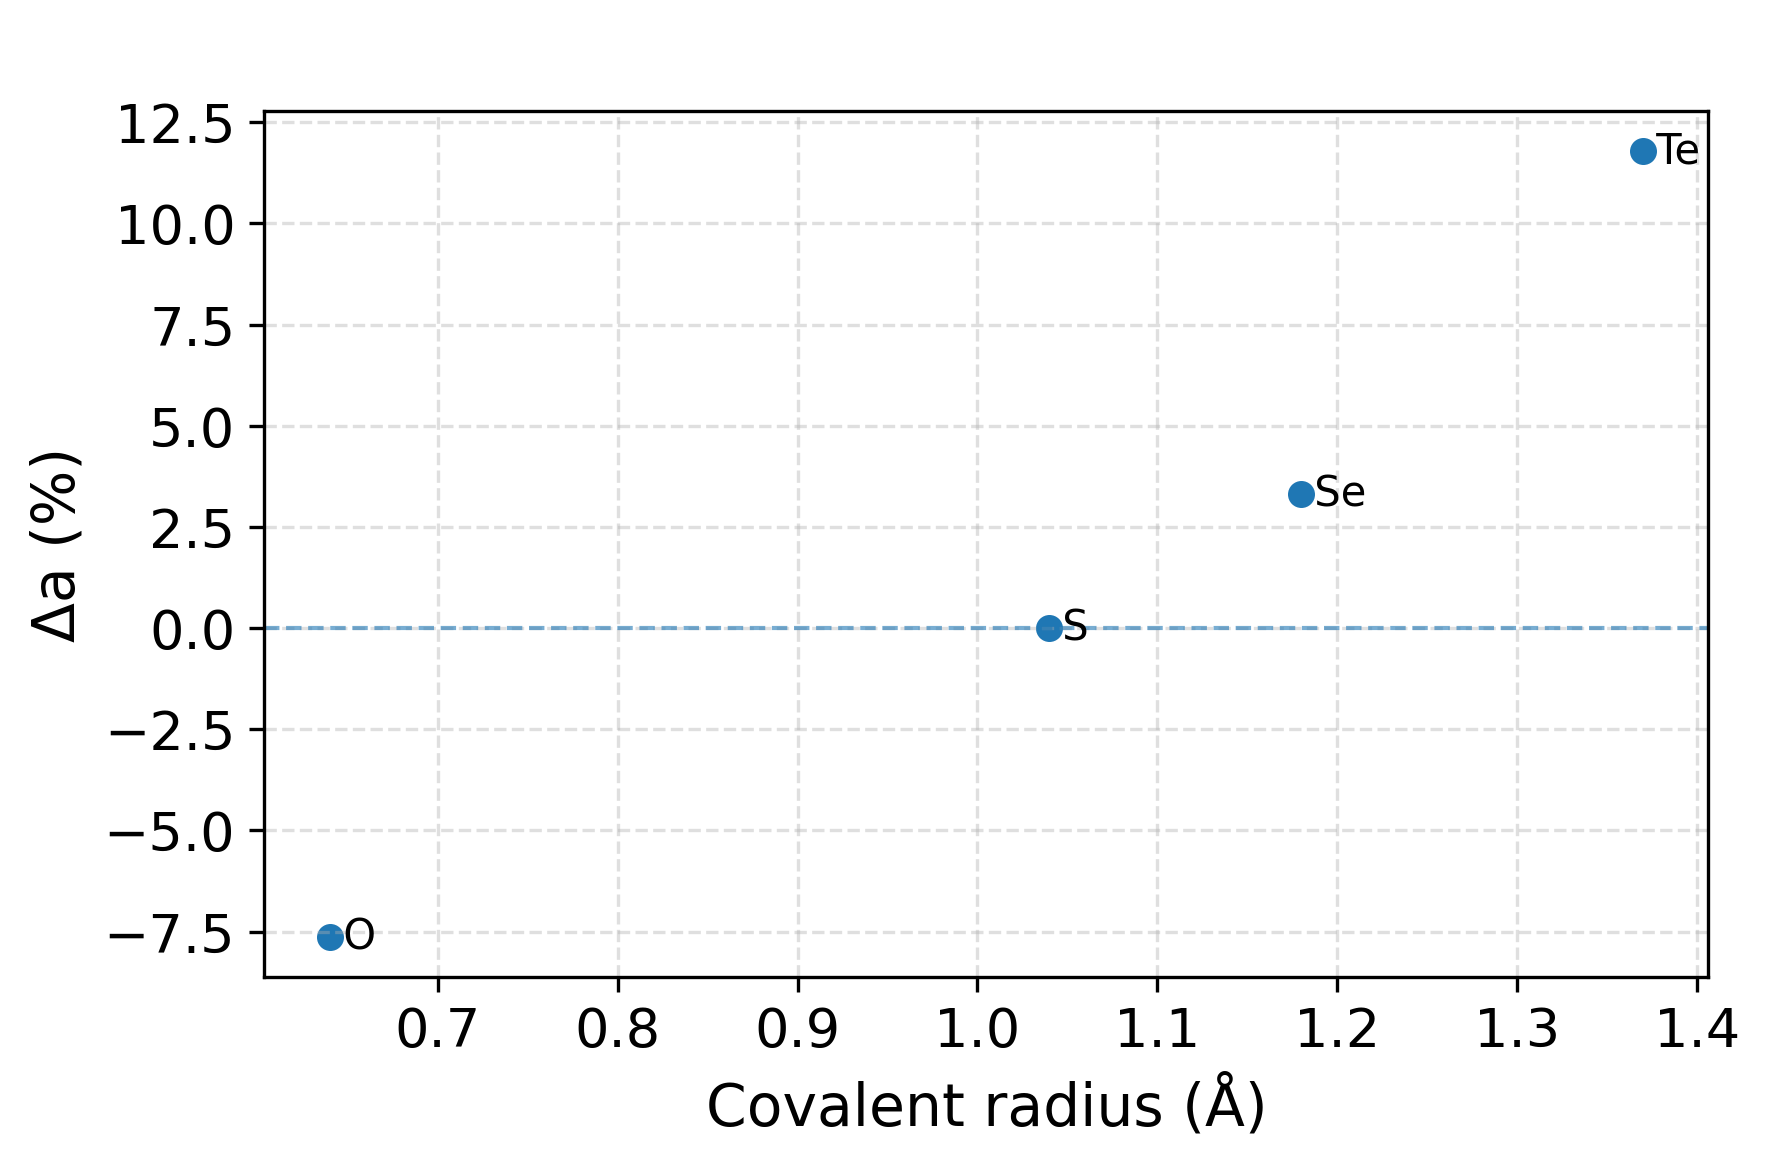


Figure S1. Lattice parameter variations vs. the covalent radius of the incorporated chalcogens on the MnPS3 monolayer.


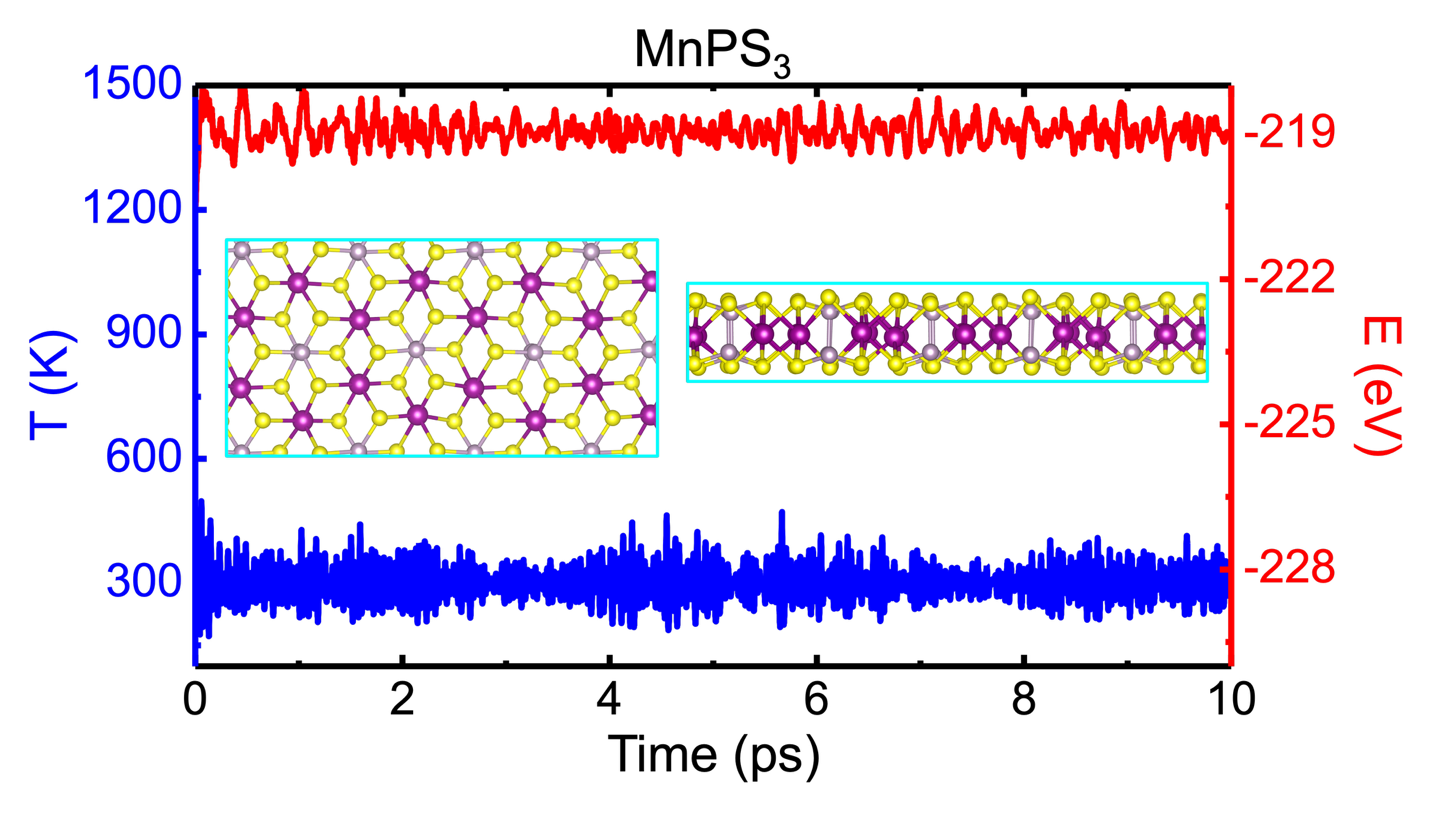


Figure S2. Fluctuation of temperature and energy, and the final structure obtained via AIMD simulations at 300 K of the MnPS3 monolayer.


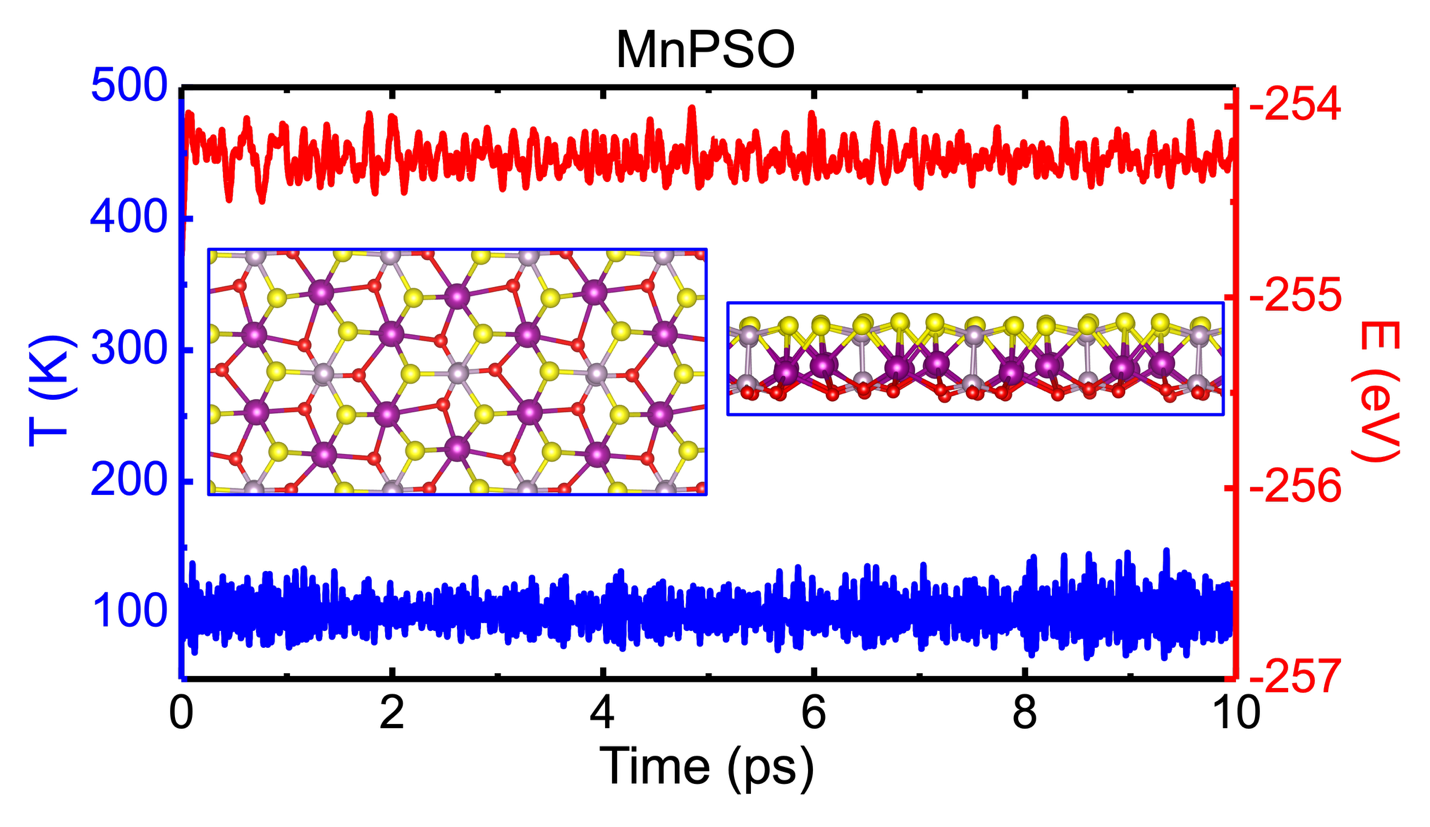


Figure S3. Fluctuation of temperature and energy, and the final structure obtained via AIMD simulations at 300 K of the MnPSO monolayer.


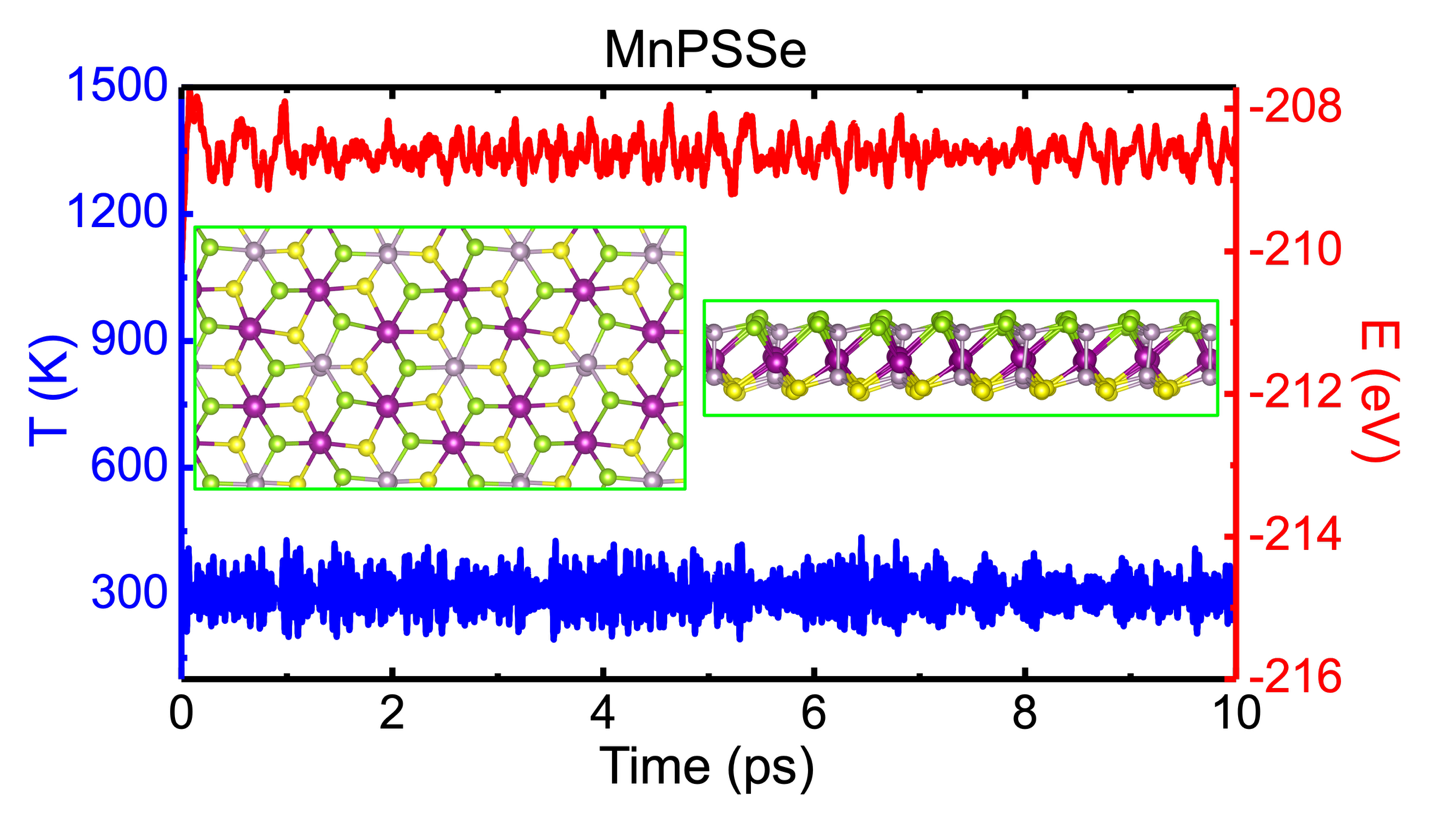


Figure S4. Fluctuation of temperature and energy, and the final structure obtained via AIMD simulations at 100 K of the MnPSSe monolayer.


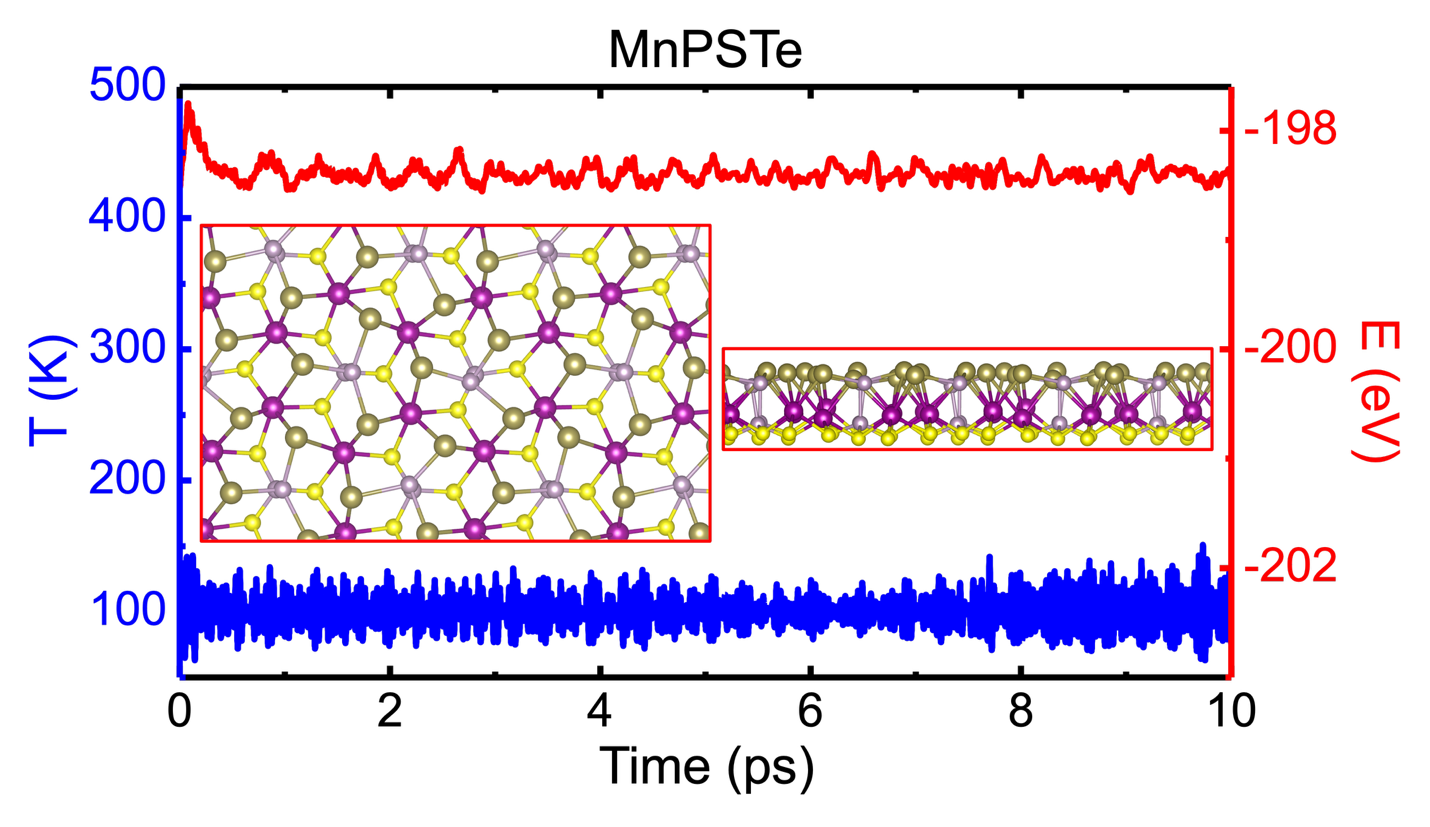


Figure S5. Fluctuation of temperature and energy, and the final structure obtained via AIMD simulations at 100 K of the MnPSTe monolayer.


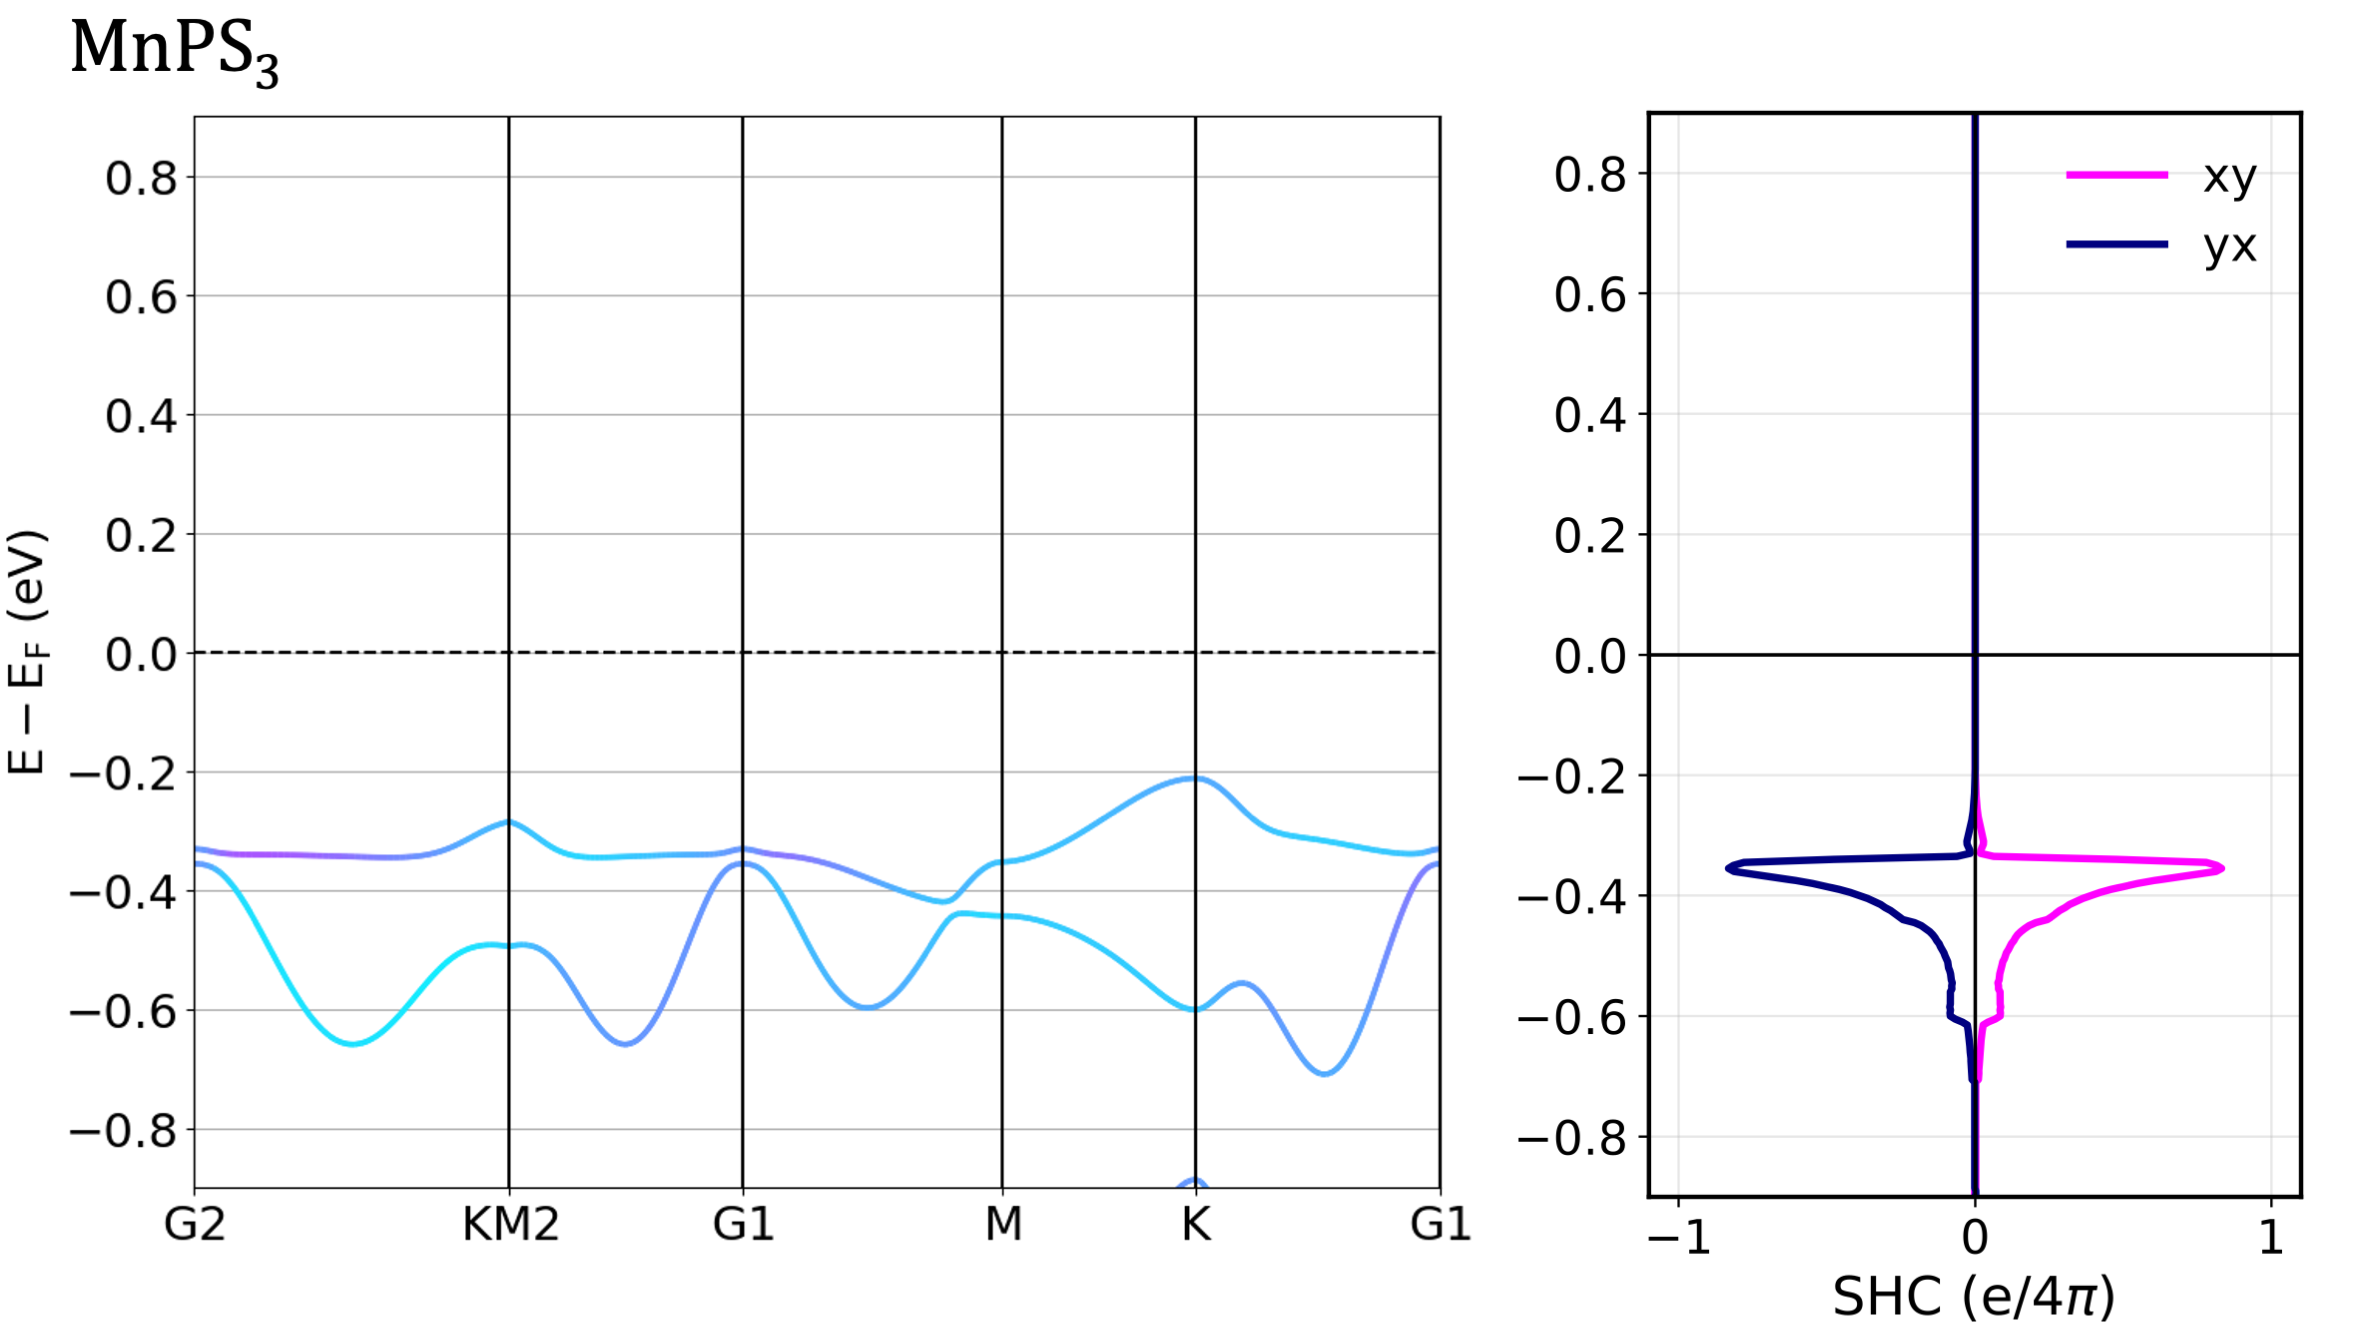


Figure S6. Spin–orbit–coupling band structure and spin Hall conductivity (SHC) of pristine MnPS3 monolayer. Band dispersions (left) and SHC (right) reveal a topologically trivial character.


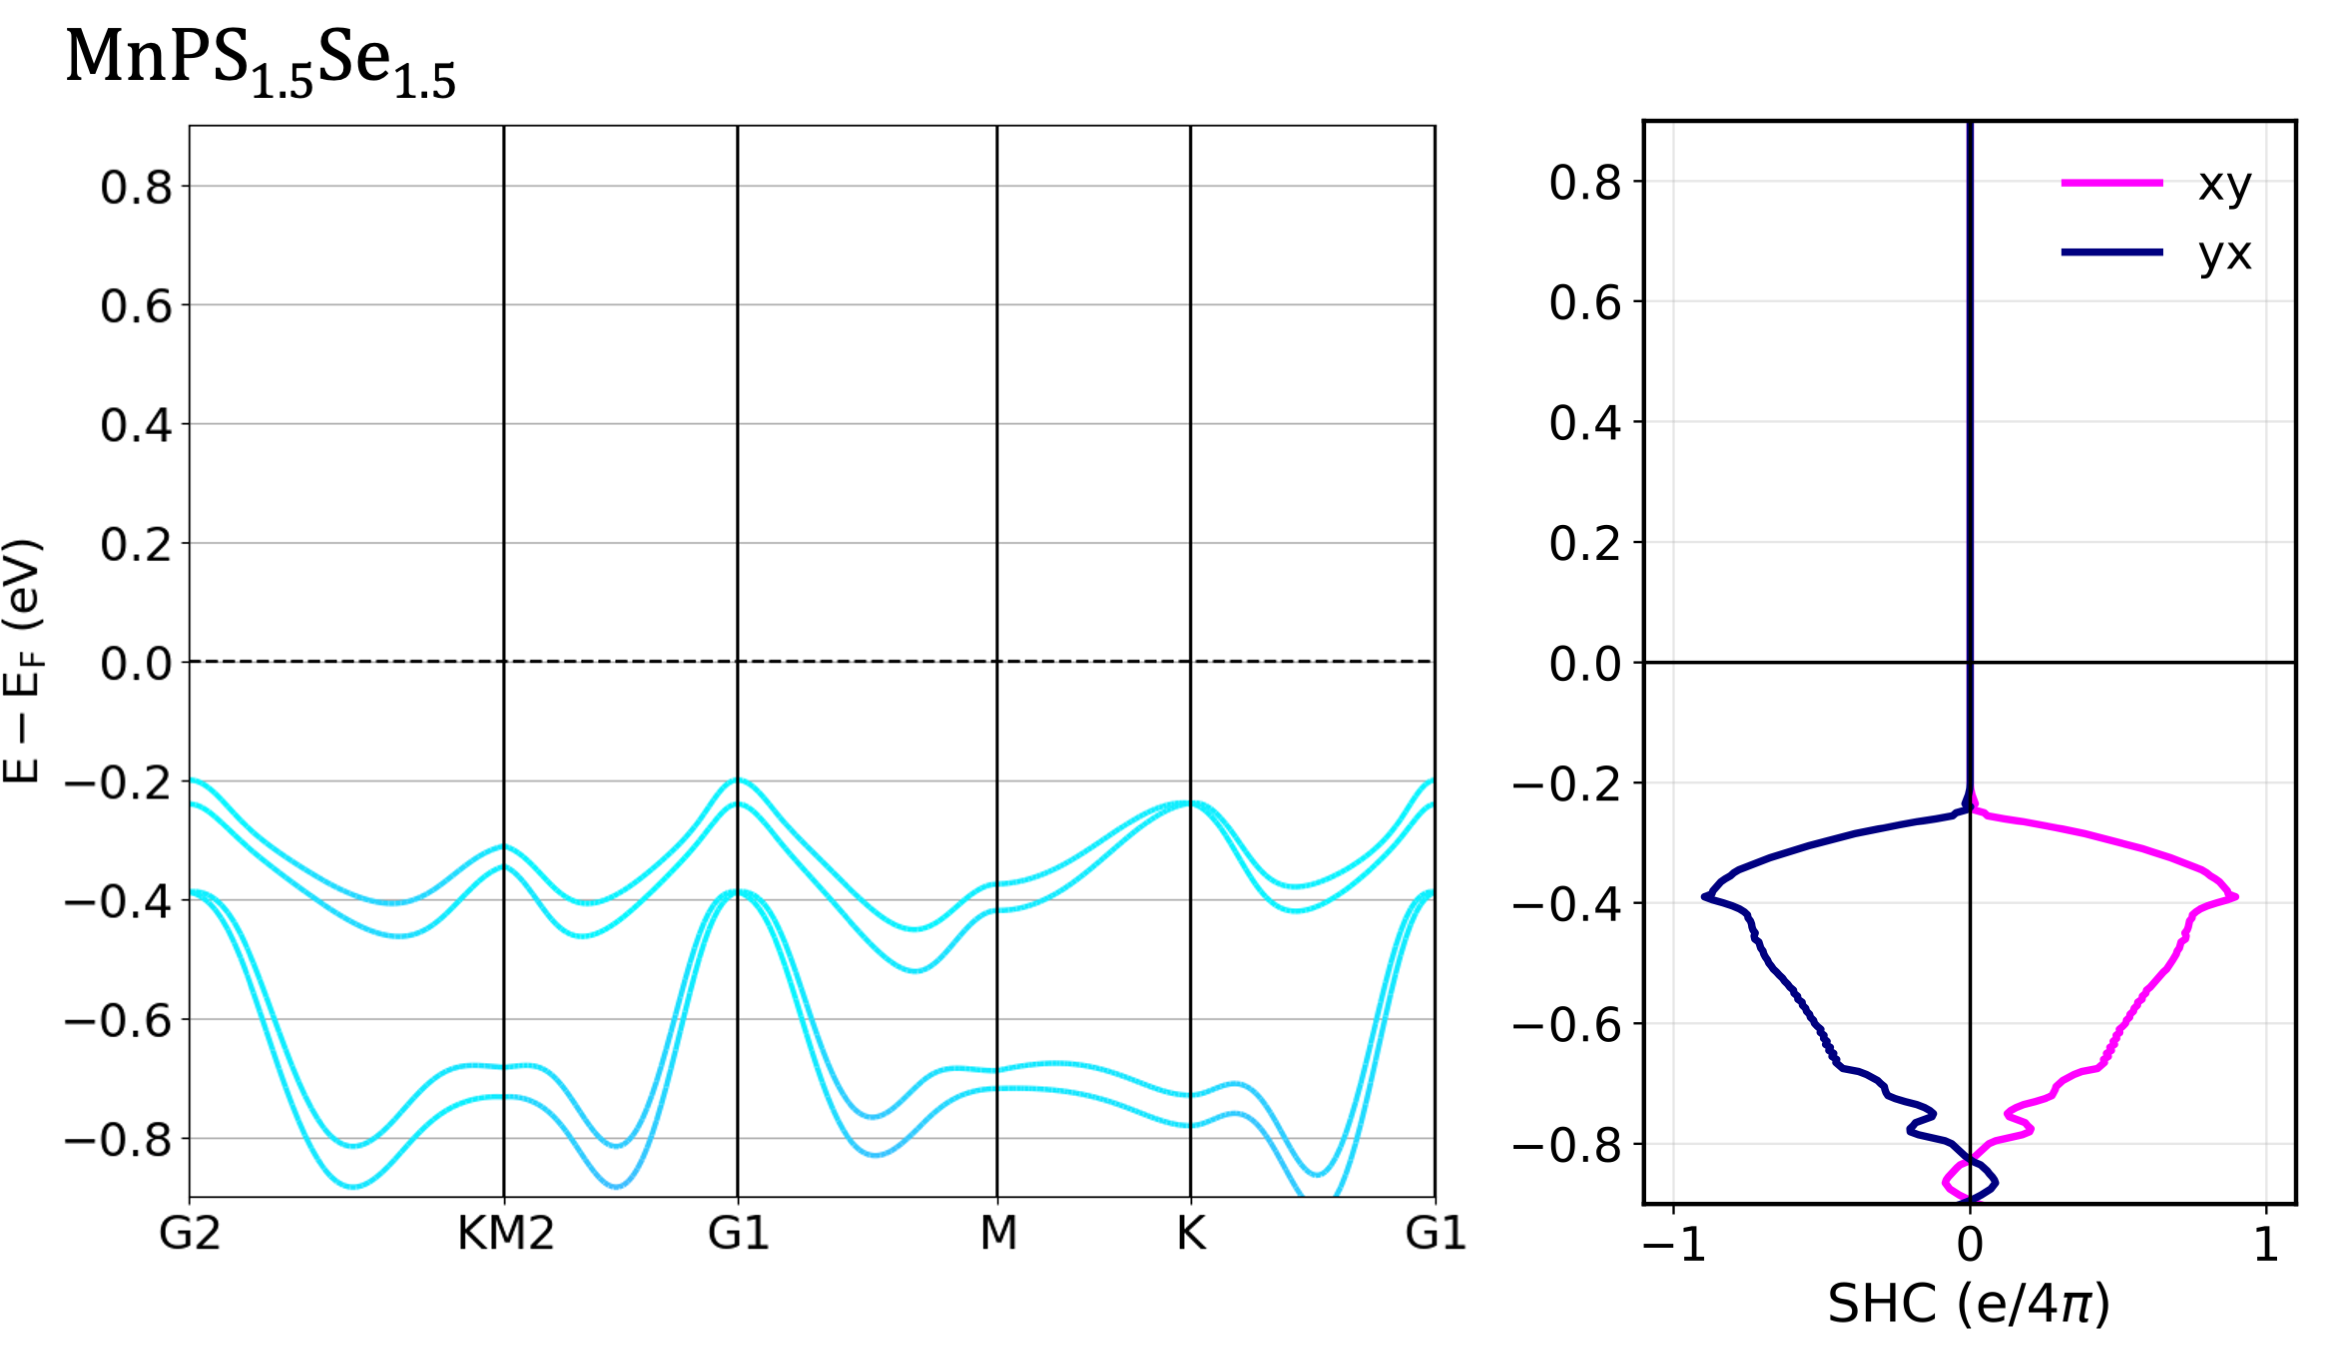


Figure S7. Spin–orbit–coupling band structure and spin Hall conductivity (SHC) of Janus MnPS1.5Se1.5 monolayer. Band dispersions (left) and SHC (right) reveal a topologically trivial character.
